# Supplementary material for: Learning precise spatiotemporal sequences via biophysically realistic learning rules in a modular, spiking network
Source: eLife journal article supplement (doi:10.7554/elife.63751), 2021-03-16
Supplement: supp2 [file elife-63751-supp2-v1.docx]

| Parameter | Value | Units | Description |
| --- | --- | --- | --- |
| K | 280 | - | Number of units in reservoir |
| g | 1.5 | μS | Gain parameter |
| M | 1120 | - | Number of units in sparse pattern net |
|  | 7.5 | Hz | Threshold for columnar to reservoir excitation |
|  | 0.1 | - | Threshold for reservoir to sparse net excitation |
|  | .15 | μS | Rate of Poisson stimulus pulse |
|  | 100 | ms | Time constant for units in reservoir |
|  | 40,10 | ms | Excitatory and inhibitory time constants, rate-based network |
|  | 2 | - | Upper threshold, rate-based transfer function |
|  | 0 | - | Lower threshold, rate-based transfer function |
|  | 2 | - | Scaling parameter, rate-based transfer function |

**Supplementary File 2. Table of Reservoir, Sparse Net, and Rate-Based Model Parameters.**
